# Supplementary material for: Towards Efficient and Accurate SARS-CoV-2 Genome Sequence Typing Based on Supervised Learning Approaches
Source: MDPI journal article supplement (doi:10.3390/microorganisms10091785), 2022-09-04
Supplement: s1 [file s1]

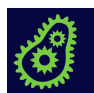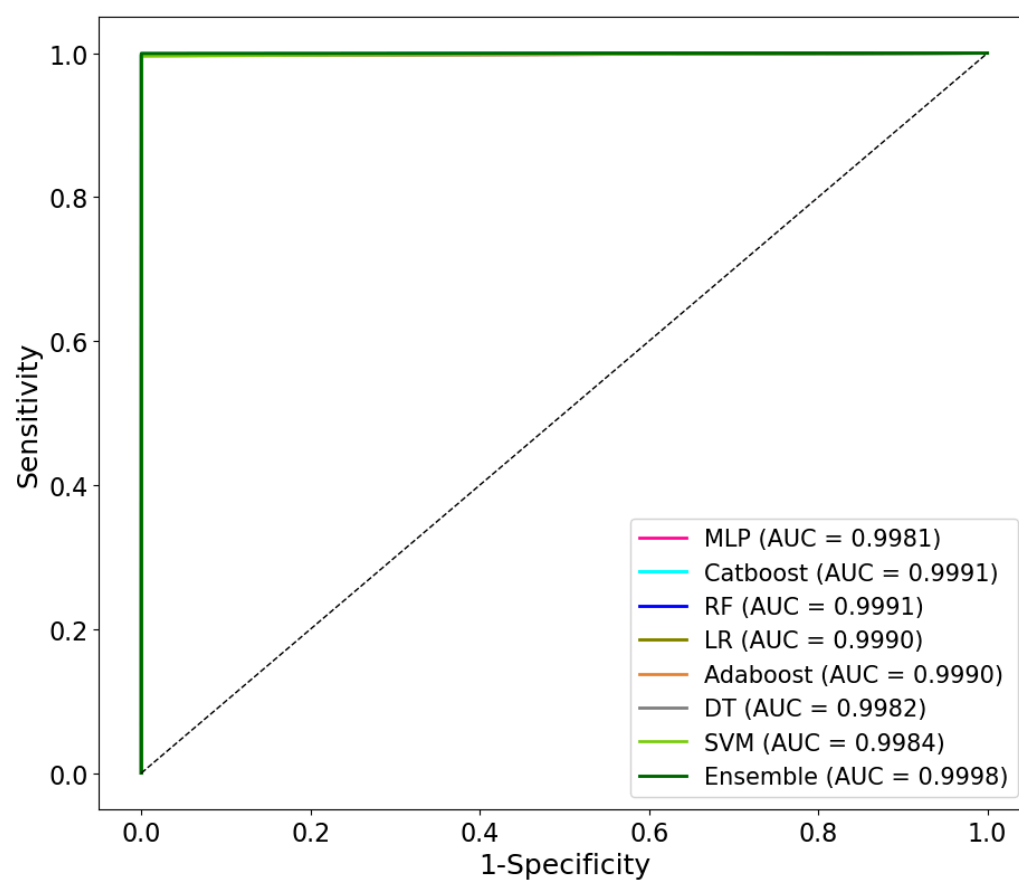

**Figure S1.** ROC curves of different classification methods on the Nextstrain testing dataset.

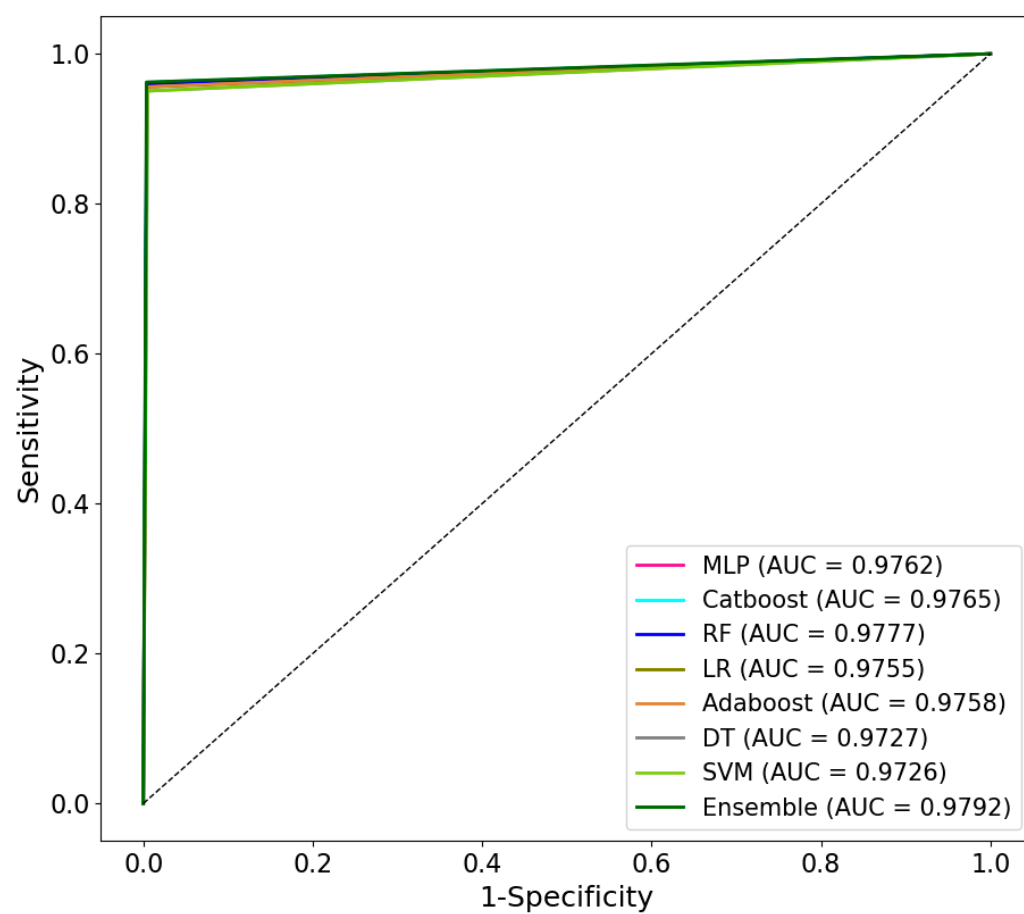

**Figure S2.** ROC curves of different classification methods on the GISAID testing dataset.

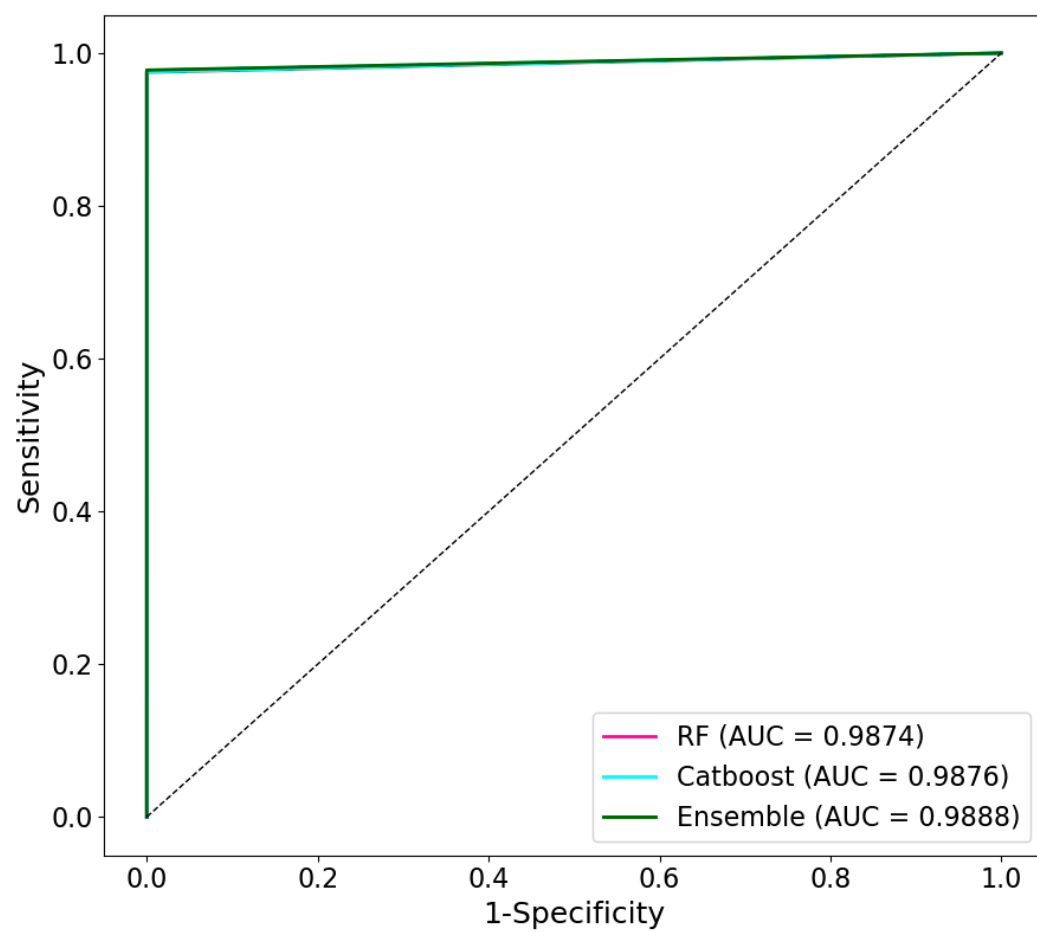

**Figure S3.** ROC curves of different classification methods on the Pangolin testing dataset.
